# Supplementary material for: A fluorescent probe based on the hydrazone Schiff base for the detection of Zn 2+ and its application on test strips
Source: Research Square preprint supplement (doi:10.21203/rs.3.rs-2310885/v1), 2022-12-05
Supplement: Supplementary file 1 [file c03123350dc5fe562cbe8198.docx]

**Electronic Supplementary Information (ESI)**

**A fluorescent probe based on the hydrazone Schiff base for the detection of Zn2+ and its application on test strips**

Guo Xua, Shu-Jie Maa, Hua-Hong Zhanga, Jing Jinga, Xing-Han Chenb, Xiao-Peng Zhanga,*

a College of Chemistry and Chemical Engineering, Key Laboratory of Water Pollution Treatment & Resource Reuse of Hainan Province, Hainan Normal University, Haikou 571158, China

b College of Chemical Engineering, Nanjing Forestry University, Nanjing 210037, China

*Corresponding author: Xiao-Peng Zhang*

*E-mail address: zxp_inorganic@126.com*

**Fig. S1** 1H NMR spectra of compound **1** in CDCl3.

**Fig. S2** 13C NMR spectra of compound **1** in CDCl3.

**Fig. S3** 1H NMR spectra of compound **SHK** in DMSO-*d*6.

**Fig. S4** 13C NMR spectra of compound **SHK** in DMSO-*d*6.

**Fig. S5** Benesi-Hildebrand plot of **SHK**-Zn2+ complexes in DMSO/H2O (9:1, v/v).

**Fig. S6** Absorbance spectra of probe **SHK** (2.5 × 10-4 M) in DMSO/H2O (9 / 1, v/v) in the presence of different concentrations of Zn2+ ions (0~140 eq).

**Fig. S7** UV-vis titration and calculation of banding constant of probe SHK for Zn2+ ions.

**Fig. S8** UV-vis absorption spectra response of **SHK** in DMSO/H2O (9:1, v/v) upon adding different amounts of Zn2+.

**Fig. S9** The stability of probe **SHK** in DMSO/H2O (9/1, v/v).


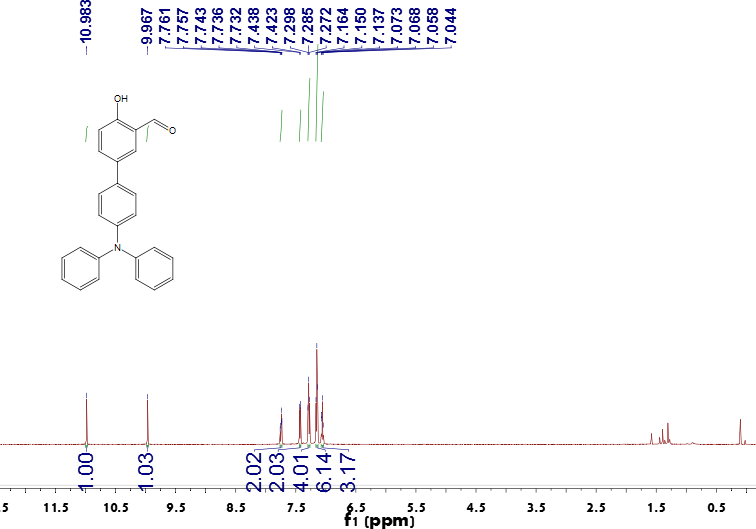


**Fig. S1** 1H NMR spectra of compound triphenylamine hydroxyl carbaldehyde in CDCl3


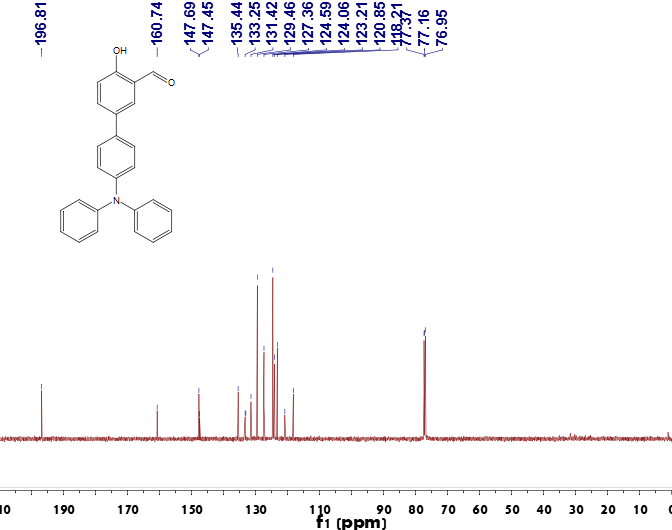


**Fig. S2** 13C NMR spectra of compound triphenylamine hydroxyl carbaldehyde in CDCl3


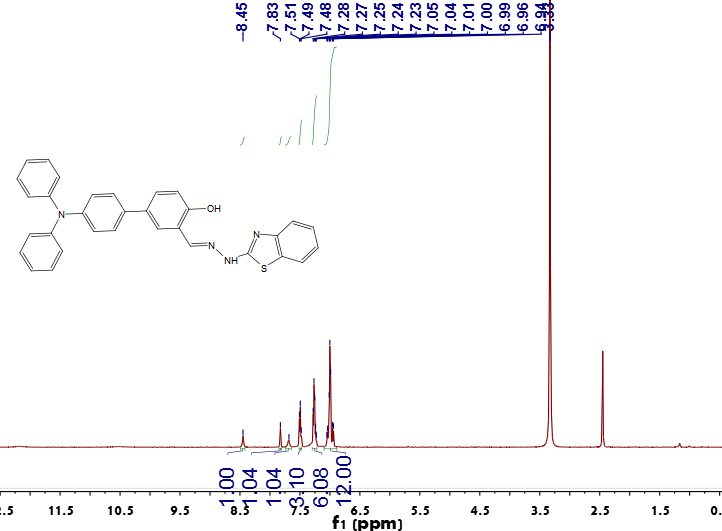


**Fig. S3** 1H NMR spectra of compound **SHK** in DMSO-*d*6
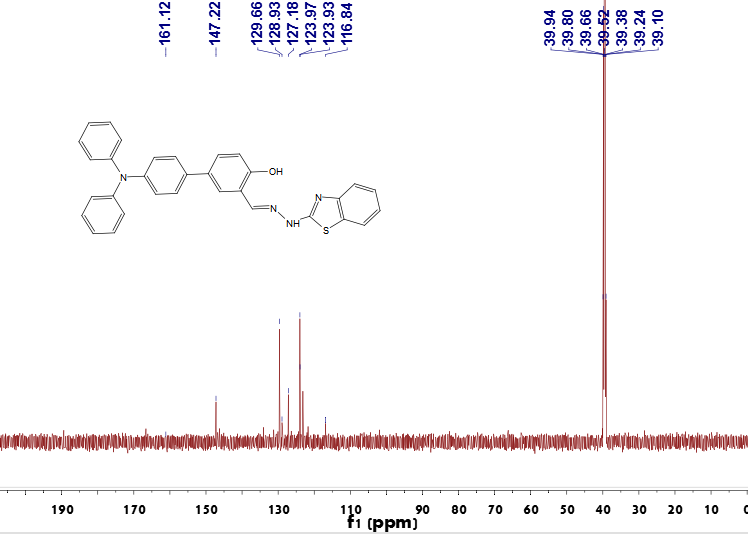
**Fig. S4** 13C NMR spectra of compound **SHK** in DMSO-*d*6

**Fig. S5** Benesi-Hildebrand plot of **SHK**-Zn2+ complexes in DMSO/H2O (9:1, v/v)

**Fig. S6** Absorbance spectra of probe **SHK** (2.5 × 10-4 M) in DMSO/H2O (9 / 1, v/v) in the presence of different concentrations of Zn2+ ions (0~140 eq)

**Fig. S7** UV-vis titration and calculation of banding constant of probe **SHK** for Zn2+ ions

**Fig. S8** UV-vis absorption spectra response of **SHK** in DMSO/H2O (9:1, v/v) upon adding different amounts of Zn2+

**Fig. S9** The stability of probe **SHK** in DMSO/H2O (9/1, v/v)
